# Supplementary material for: Regulating electric double-layer dynamics for robust solid-electrolyte interface layer in fast-charging graphite anodes
Source: Royal Society of Chemistry journal article supplement (doi:10.1039/d4ta03703k), 2024-01-01
Supplement: d4ta03703k1.pdf [file d4ta03703k1.pdf]

## Supplementary Information

### Regulating Electric Double Layer Dynamics for Robust SEI in Fast-Charging Graphite Anodes

*Jaeyeon Bang,<sup>a</sup> Seong-Soo Park,<sup>b</sup> Kyungjun Kim,<sup>a</sup> Hwiju Lee,<sup>a</sup> Ilyoung Choi,<sup>c</sup> Youngugk Kim,<sup>c\*</sup> JangHyuck Moon,<sup>\*b</sup> Sang-Min Lee<sup>\*a,d</sup>*

<sup>a</sup> Department of Battery Engineering, Graduate Institute of Ferrous & Eco Materials Technology (GIFT), Pohang University of Science and Technology (POSTECH), 77, Cheonam-Ro, Nam-Gu, Pohang, Gyungbuk 37673, Republic of Korea

<sup>b</sup> Department of Energy Systems Engineering, Chung-Ang University, 84 Heukseok-ro, Dongjak-gu, Seoul 06974, Republic of Korea

<sup>c</sup> Samsung SDI Co., Ltd. R&D Center, Suwon, 16678 Republic of Korea

<sup>d</sup> Department of Materials Science and Engineering, Pohang University of Science and Technology (POSTECH), 77, Cheonam-Ro, Nam-Gu, Pohang, Gyungbuk 37673, Republic of Korea

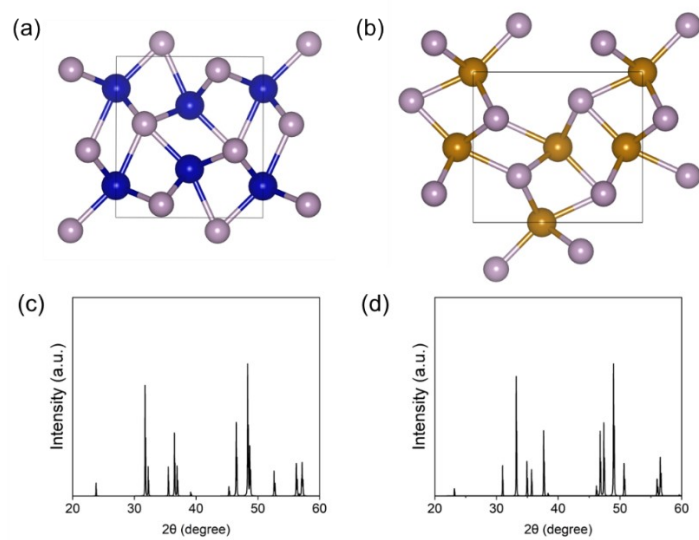

**Fig. S1** Calculated crystal structures and XRD peaks of (a, c) CoP and (b, d) FeP, respectively.

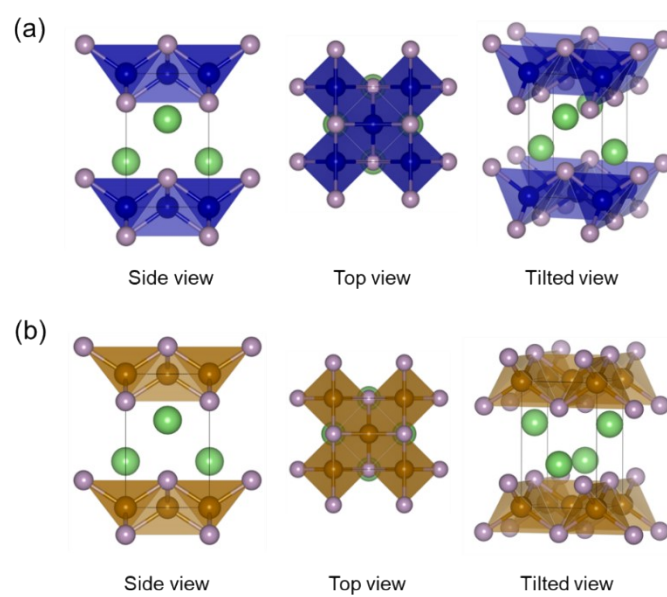

**Fig. S2** Calculated crystal structures of (a) LiCoP and (b) LiFeP different viewing angles.

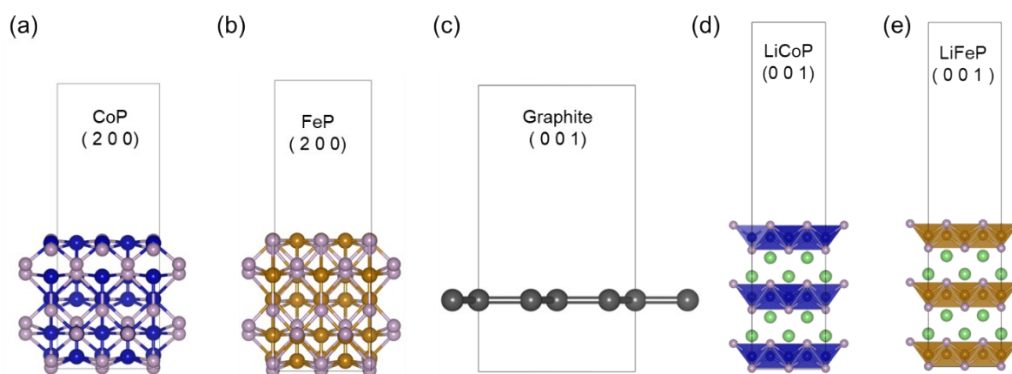

**Fig. S3** The calculated surface of (a) (200) for CoP, (b) (200) for FeP, (c) (001) for graphite, (d) (001) for LiCoP, and (e) (001) LiFeP.

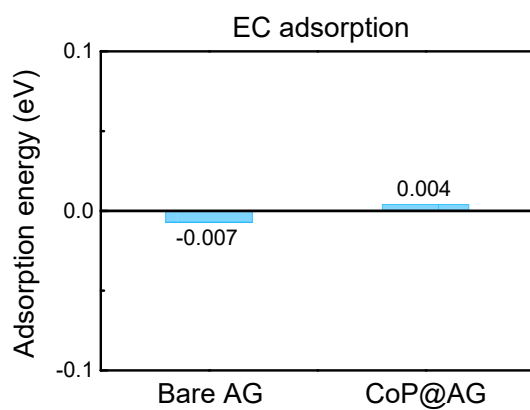

**Fig. S4** Adsorption energy of EC for Bare AG and CoP@AG surface.

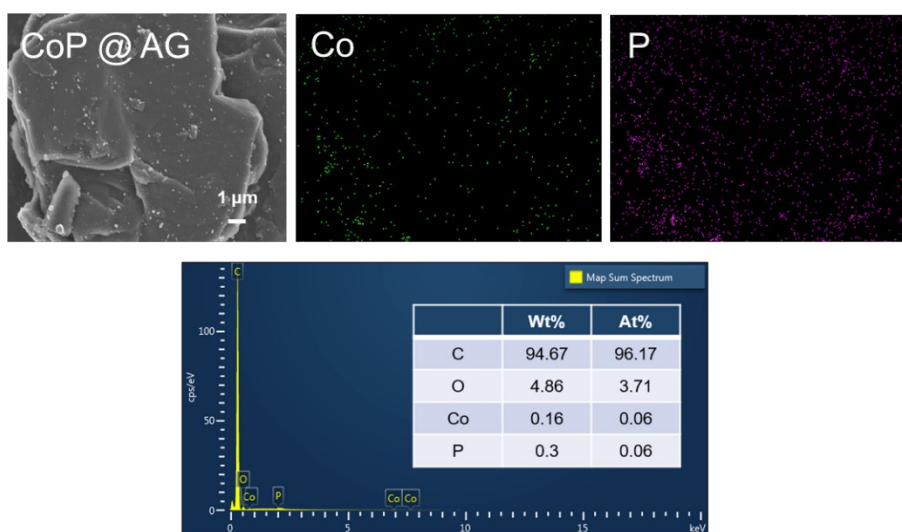

**Fig. S5** Elemental distribution and composition ratio of CoP@AG

| Sample | Element | Result  |                     |
|--------|---------|---------|---------------------|
| CoP@AG | Co      | 0.45wt% | ICP-OES<br>iCAP Pro |
|        | P       | 0.3wt%  |                     |

**Fig. S6** ICP-OES measurement of CoP@AG powder

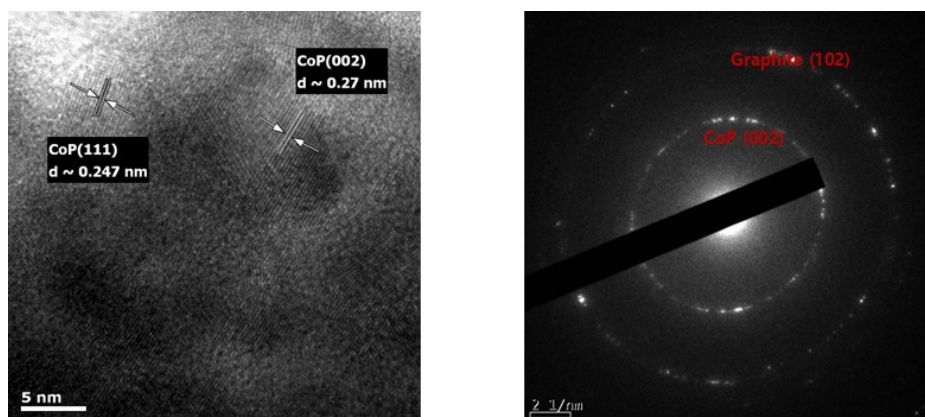

**Fig. S7** TEM and SAED images of CoP@AG particles

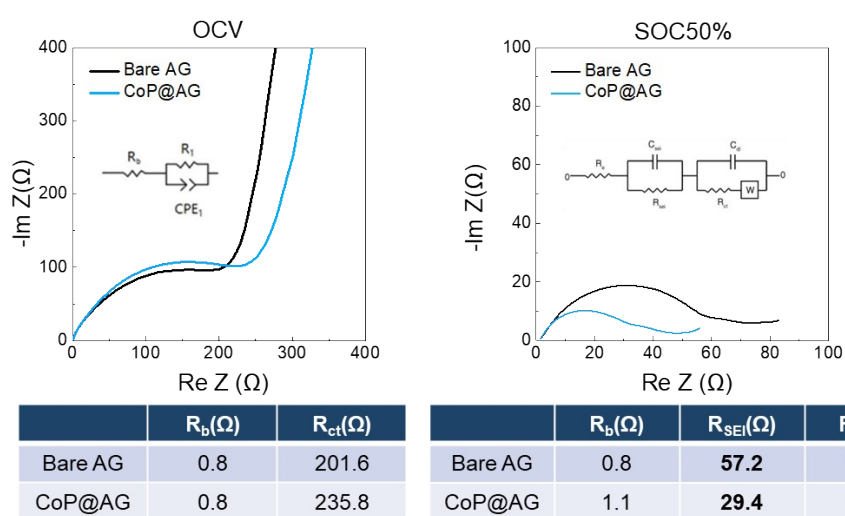

**Fig. S8** Nyquist plots of Bare AG and CoP@AG half cells at OCV state and SOC 50% state.

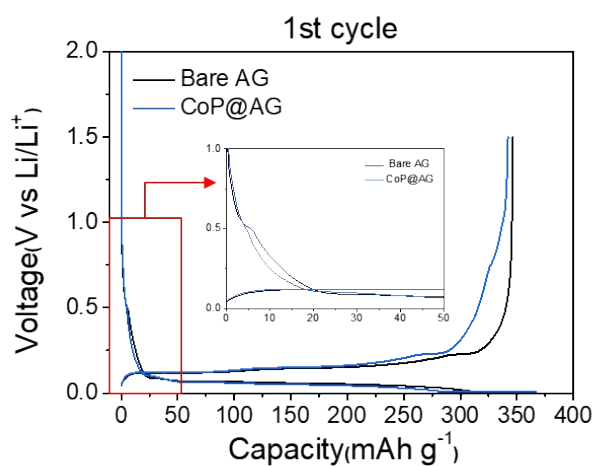

**Fig. S9** Galvanostatic charge/discharge profiles of Bare AG and CoP@AG using electrolyte without FEC additive.

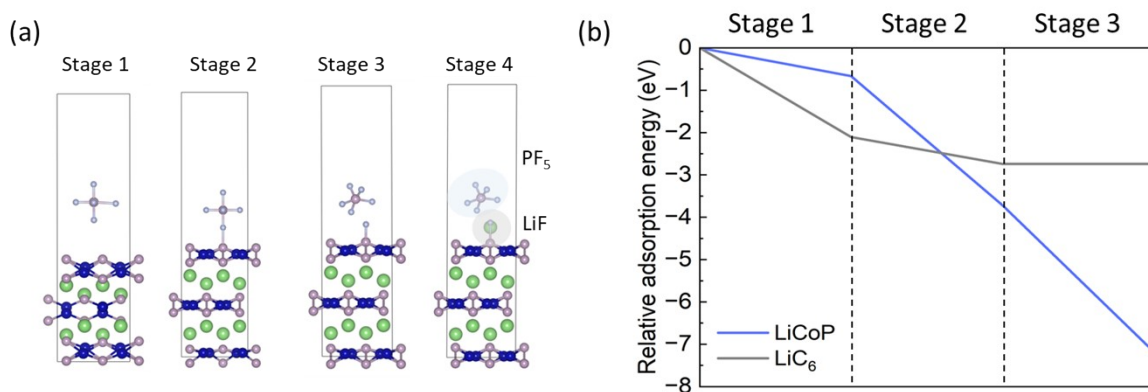

**Fig. S10** (a) Decomposition process of  $\text{PF}_6^-$  and formation of LiF on LiCoP surfaces. (b) The relative adsorption (formation) energies of  $\text{PF}_6^-$  adsorption (Stage 1),  $\text{PF}_6^-$  decomposition (Stage 2),  $\text{PF}_6^-$  decomposition (Stage 3) and LiF formation (Stage 4) on LiCoP and  $\text{LiC}_6$  surface.

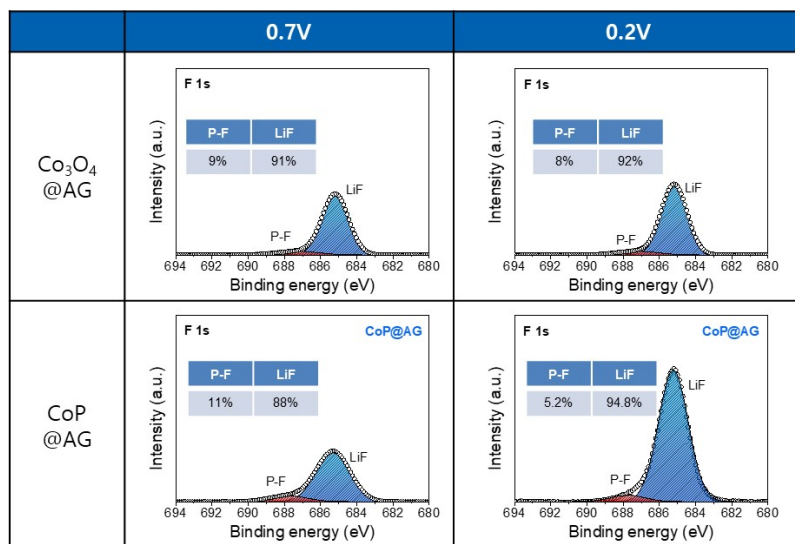

**Fig. S11** Evolution behavior of the SEI layer of Co<sub>3</sub>O<sub>4</sub>@AG through XPS analysis after charging to 0.7V and 0.2V.

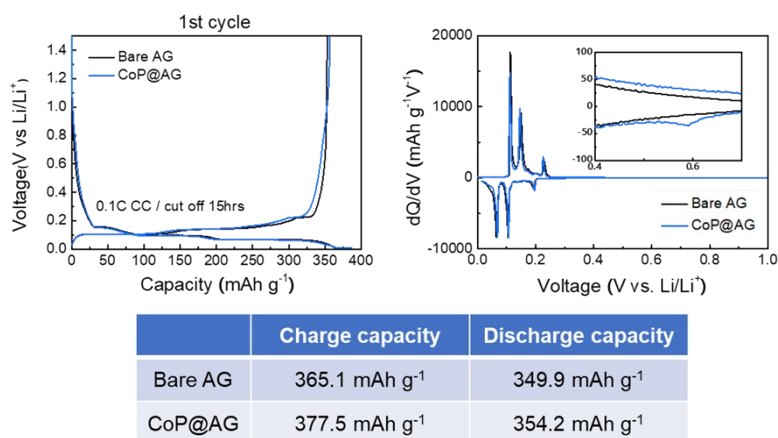

**Fig. S12** Galvanostatic charge/discharge profiles and dQ/dV plot of Bare AG and CoP@AG using electrolyte that containing FEC additive.

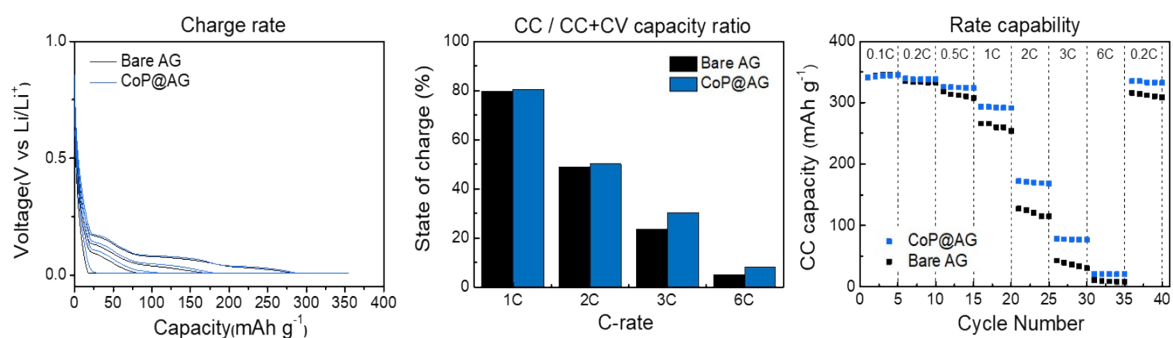

**Fig. S13** Rate capability of the Bare AG and CoP@AG half-cell at various C-rates.

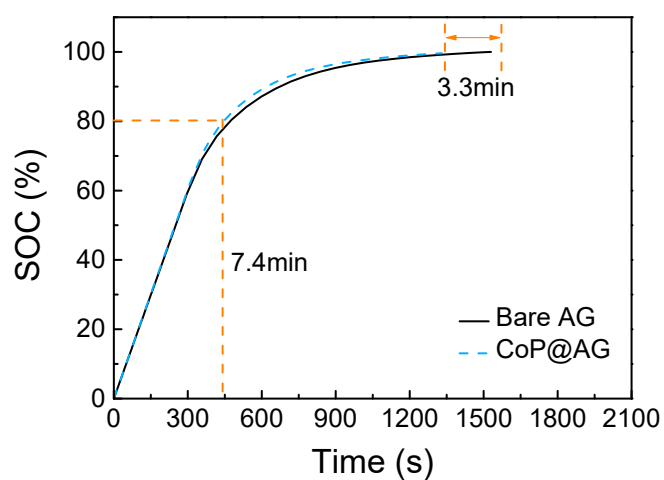

**Fig. S14** SOC vs. time profiles of full cells with Bare AG and CoP@AG anodes.



NCM811 / Bare AG

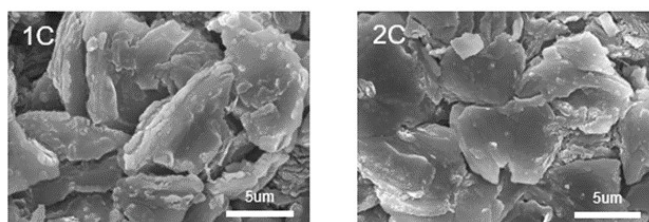

NCM811 / CoP@AG

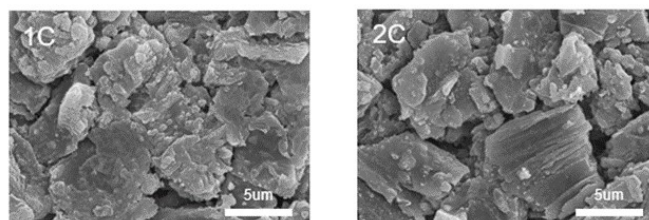

**Fig. S15** SEM images of Bare AG and CoP@AG electrodes after 1C, 2C charge.

NCM 811 / Bare AG

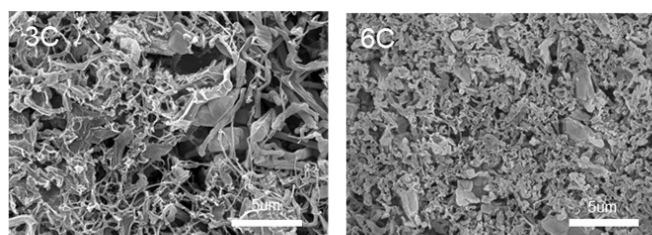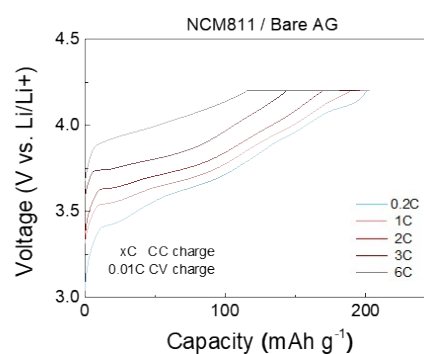

**Fig. S16** SEM images of Bare AG electrodes after 3C,6C charge and voltage profile of NCM811 / Bare AG full cell at various C rates.

NCM 811 / Bare AG

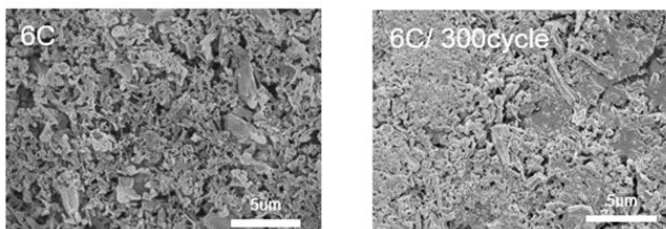

NCM 811 / CoP@AG

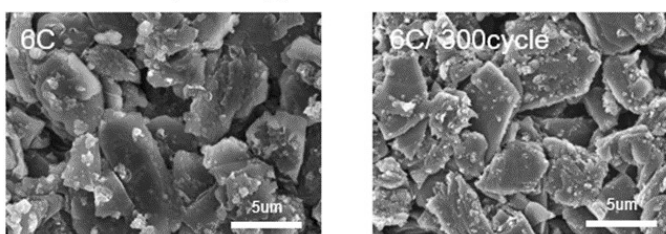

Fig. S17 SEM images of Bare AG and CoP@AG electrodes after 300 cycles at 6C.

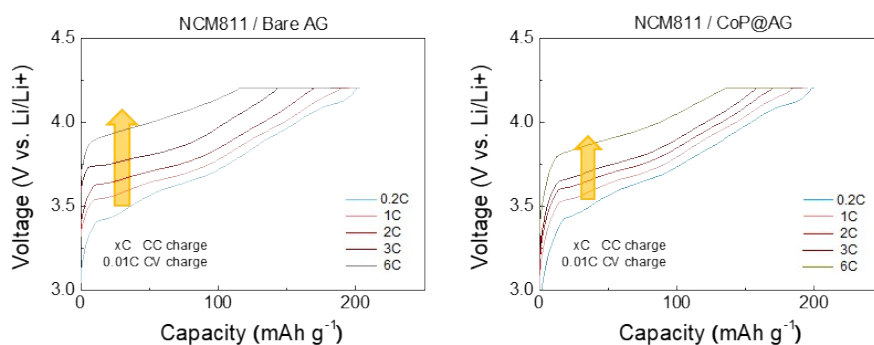

| CC/CC+CV(%) | 0.2C  | 1C    | 2C    | 3C    | 6C   |
|-------------|-------|-------|-------|-------|------|
| Bare AG     | 98.7% | 91.9% | 84.1% | 71.4% | 58.7 |
| CoP@AG      | 98.7% | 93.0% | 86.4% | 80.6% | 68.0 |

Fig. S18 The CC/CC+CV ratio at each C rate for Bare AG and CoP@AG full cells.

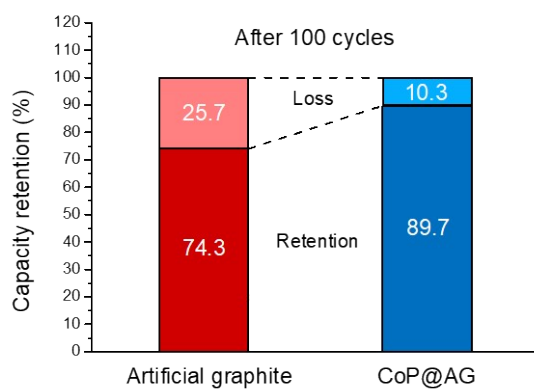

**Fig. S19** Capacity retentions of Bare AG and CoP@AG full cells after 100 cycles(6C charging-1C discharging).

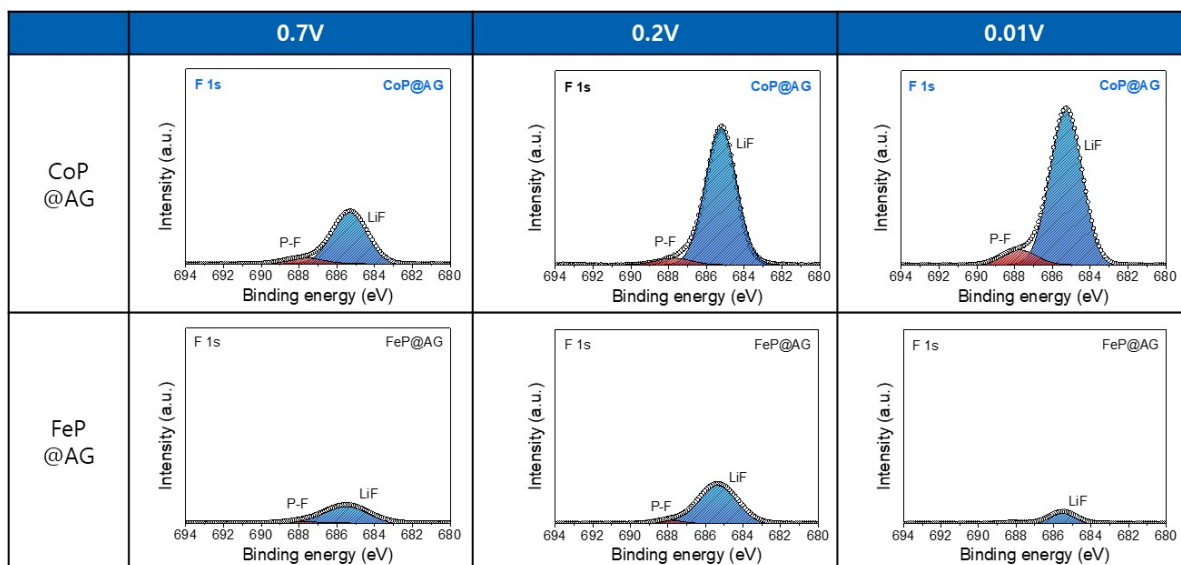

**Fig. S20** Evolution behavior of the SEI layer of FeP@AG through XPS analysis after charging to 0.7V, 0.2V and 0.01V.

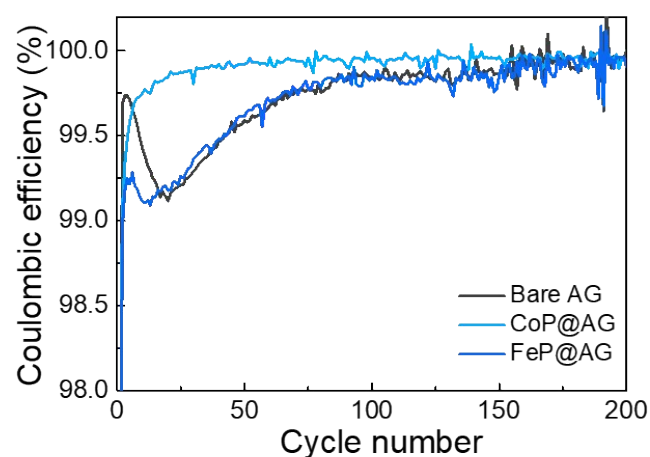

**Fig. S21 Coulombic efficiency of Bare AG, CoP@AG and FeP@AG**

| Example                                | Electrode composition(wt%) (AM <sup>a</sup> : CM <sup>b</sup> : BM <sup>c</sup> ) | N/P ratio  | Areal capacity (mAh cm <sup>-2</sup> ) | Electrode density (g cm <sup>-3</sup> ) | ICE       | Fast-charge cyclability (retention) (%cycle no.) | Reference        |
|----------------------------------------|-----------------------------------------------------------------------------------|------------|----------------------------------------|-----------------------------------------|-----------|--------------------------------------------------|------------------|
| GPC                                    | 92:2:6                                                                            | 1.1        | 1.5                                    | -                                       | 91.1      | 1C (84%, 200cycle)                               | 1                |
| <a href="#">Gr@La<sub>0.1</sub>TNO</a> | 93:2:5                                                                            | 0.6        | 0.95                                   | -                                       | 86.4      | 3C(76%, 200cycle)                                | 2                |
| Photo-graphite                         | 93:3:4                                                                            | 1.1        | 2.9                                    | -                                       | 94.3      | 3C(95%, 50cycle)                                 | 3                |
| Graphite                               | 80:10:10                                                                          | 1          | 0.3                                    | -                                       | -         | 4C(86%,100 cycle)                                | 4                |
| G@Cu-CuNW                              | 94:4:2                                                                            | 1.05       | 3.2                                    | 1.5                                     | 91        | 3C(50%,50c ycle)                                 | 5                |
| Edge-plane activated graphite(EAG)     | 96:1:3                                                                            | 1.1        | 3.34                                   | 1.6                                     | 93.8      | 3C(70%,50c ycle)                                 | 6                |
| Mo-CP/graphite                         | 96:0:4                                                                            | 1.1        | 2.2                                    | 1.5                                     | 92        | 6C(84%,300 cycle)                                | 7                |
| <b>CoP@AG (This work)</b>              | <b>97.5:1:1.5</b>                                                                 | <b>1.1</b> | <b>2.2</b>                             | <b>1.5</b>                              | <b>91</b> | <b>6C(88%,300 cycle)</b>                         | <b>This work</b> |

a. Active material, b. Conductive agent, c. Binder material

**Supplementary Table 1.** Comparison of the fast chargeability of various anode materials for

LIBs

### Supplementary References

1. M. H. Kim, J. Kim, S. H. Choi, T. U. Wi, A. Choi, J. Seo, C. H. Lim, C. Park and H. W. Lee, *Acs Energy Lett*, 2023, **8**, 3962-3970.
2. Y. L. Sheng, X. Y. Yue, W. Hao, Y. T. Dong, Y. K. Liu and Z. Liang, *Nano Lett*, 2024, **24**, 3694-3701.
3. M. Baek, J. Kim, J. Jin and J. W. Choi, *Nat Commun*, 2021, **12**.
4. C. C. Sun, X. Ji, S. T. Weng, R. H. Li, X. T. Huang, C. N. Zhu, X. Z. Xiao, T. Deng, L. W. Fan, L. X. Chen, X. F. Wang, C. S. Wang and X. L. Fan, *Adv Mater*, 2022, **34**.
5. L. L. Lu, Y. Y. Lu, Z. X. Zhu, J. X. Shao, H. B. Yao, S. G. Wang, T. W. Zhang, Y. Ni, X. X. Wang and S. H. Yu, *Sci Adv*, 2022, **8**.
6. N. Kim, S. Chae, J. Ma, M. Ko and J. Cho, *Nat Commun*, 2017, **8**.
7. S. M. Lee, J. Kim, J. Moon, K. N. Jung, J. H. Kim, G. J. Park, J. H. Choi, D. Y. Rhee, J. S. Kim, J. W. Lee and M. S. Park, *Nat Commun*, 2021, **12**.
